# Supplementary material
Source: PubMed Central journal article supplement (PMC3093483)
Supplement: 1104588108_pnas.201104588SI.pdf [file 1104588108_pnas.201104588SI.pdf]

# Supporting Information

MacLeod et al. 10.1073/pnas.1104588108

## SI Methods

Anti-CD127-PE, anti-CD4, and anti-CD8 APC-Cy7 and streptavidin PeCy7 were purchased from BD. Anti-B220-Pacific blue, anti-F4/80-Pacific blue, anti-CD44 PerCP-Cy5.5, and anti-CCR7 biotin were purchased from eBioscience. Anti-CD44 (IM3) Alexa Fluor 488, anti-CD122 (TM $\beta$ 1.4) Alexa Fluor 488,

anti-class MHC II (Y3P) Alexa Fluor 405, and anti-IFN- $\gamma$  (XMG1.2) Alexa Fluor 647 were produced in the laboratory at National Jewish Health using Alexa Fluor 488, 405, and 657 protein conjugation kits (Molecular Probes). Anti-BrdU Alexa Fluor 488 and Alexa Fluor 647 were obtained from Molecular Probes.

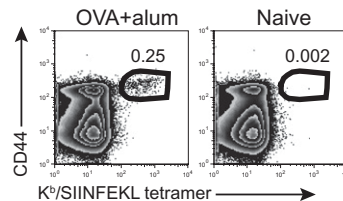

**Fig. S1.** Immunization with alum and OVA primes antigen-specific CD8 T cells that can be detected by MHC class I tetramers. B6 mice were immunized with OVA plus alum or not immunized, and the percentage of K<sup>b</sup>/SIINFEKL tet<sup>+</sup> cells in the spleen was examined 9 d later. The numbers are the percentage of cells within the indicated gate. Cells are gated on CD8<sup>+</sup>CD4<sup>-</sup>B220<sup>-</sup>F4/80<sup>-</sup>MHCII<sup>-</sup> cells. The data shown are representative of eight experiments with three or four mice per group.

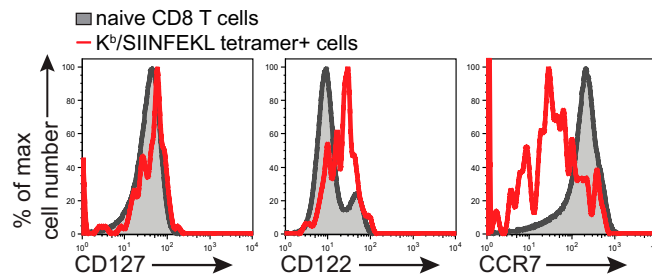

**Fig. S2.** Memory cells generated with OVA plus alum prime effector memory CD8 T cells. The phenotypes of memory CD44<sup>hi</sup> K<sup>b</sup>/SIINFEKL tet<sup>+</sup> gates (red line) or CD8<sup>+</sup> cells (closed gray histogram) were examined at 60 d after immunization with OVA plus alum. The data are representative of three or four experiments with three or four mice per group.

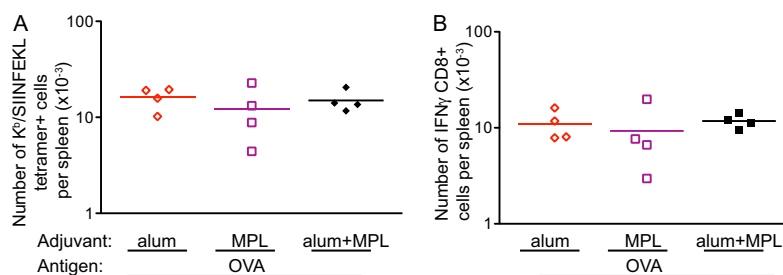

**Fig. S3.** The addition of MPL affects neither the number of T cells nor the number of IFN- $\gamma$ -producing cells primed with alum and antigen. (A) The number of K<sup>b</sup>/SIINFEKL tet<sup>+</sup> CD8 T cells in the spleens of B6 mice primed with OVA with alum, MPL, or both adjuvants was examined at 8 d after immunization. (B) Alternatively, splenocytes from these mice were activated ex vivo with SIINFEKL in the presence of Golgi plug for 6 h. The numbers of CD8<sup>+</sup>CD4<sup>-</sup>B220<sup>-</sup>MHCII<sup>-</sup> cells that were IFN- $\gamma$ <sup>+</sup> were examined by intracellular staining. Each symbol represents a mouse, and the line indicates the group mean value. The data are representative of three experiments with four mice per group in each experiment.

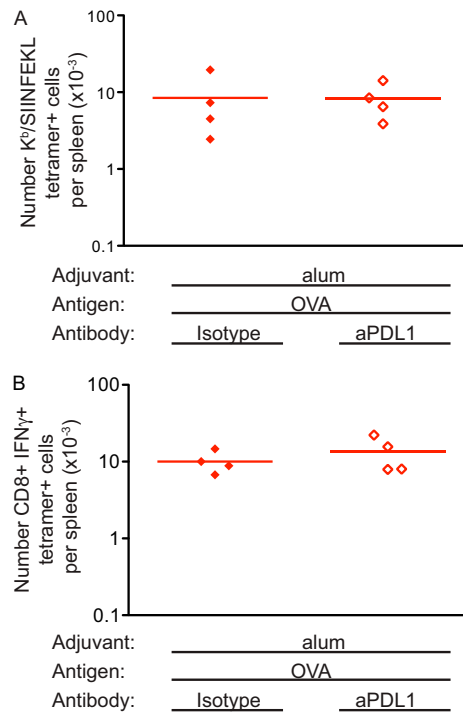

**Fig. S4.** Blockade of PDL1 affects neither the number of T cells primed nor their IFN- $\gamma$  response after immunization with alum and antigen. B6 mice were primed with OVA and alum i.p. on day 0 and treated with anti-PDL1 or an isotype control antibody on days 0, 3, and 7. (A) The number of  $K^b$ /SIINFEKL tet $^+$  cells present in the spleen was examined 8 d later. (B) Alternatively, splenocytes from these mice were activated ex vivo with SIINFEKL in the presence of Golgi plug for 6 h. The numbers of CD8 $^+$ CD4 $^-$ B220 $^-$ MHCII $^-$  cells that were IFN- $\gamma$  $^+$  were examined by intracellular staining. Each point represents a mouse, and the line indicates the group mean value, representative of two experiments.

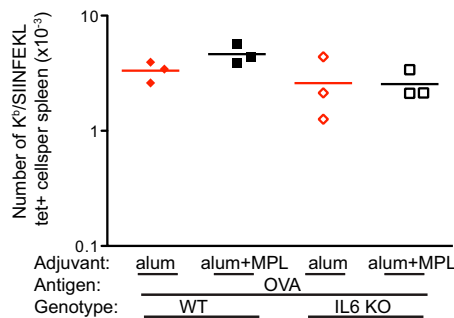

**Fig. S5.** Immunization with OVA delivered with alum or alum plus MPL primes similar numbers of antigen-specific CD8 T cells in WT and IL-6 KO mice. B6 and IL-6 KO mice were immunized with OVA plus alum or alum plus MPL i.p., and the numbers of  $K^b$ /SIINFEKL tet $^+$  CD8 T cells present in the spleens was examined 8 d later. Each symbol represents a mouse, and the line indicates the group mean. The data are representative of four experiments with three mice per group.
